# Supplementary material for: Characterization of an IncR Plasmid with Two Copies of ISCR-Linked qnrB6 from ST968 Klebsiella pneumoniae
Source: Int J Genomics. 2020 Nov 24;2020:3484328. doi: 10.1155/2020/3484328 (PMC7707992; doi:10.1155/2020/3484328)
Supplement: Supplementary Materials — Supplementary Figure S1: complex class 1 integrons of group 3 (pR50-74) and group 4 (CP030940, MG870194). Table S1: general features of K. pneumoniae R50 genome. Table S2: species distribution of IncR plasmids. Table S3: bacterial information for evolutionary analysis. [file 3484328.f1.docx]

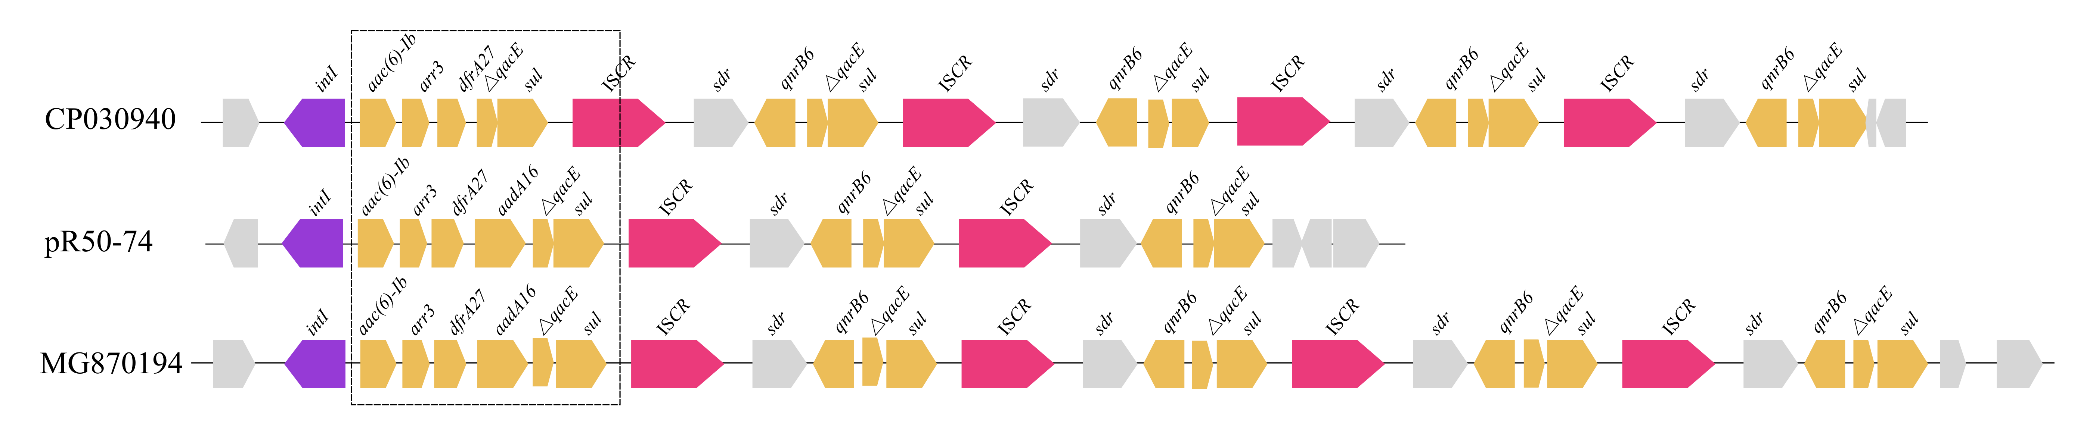


**Figure S1 complex class 1 integrons of Group 3 (pR50-74) and Group 4 (CP030940, MG870194)**

|  | chromosome | pR50-74 |
| --- | --- | --- |
| Size (bp) | 5210287 | 74011 |
| G+C % | 57.50 | 53.10 |
| Total opening reading frames | 4,792 | 89 |
| Known proteins | 4236 (88%) | 66 (74%) |
| Hypothetical proteins | 556 (12%) | 23 (26%) |
| Protein coding sequence (%) | 87 | 80 |
| Average ORF length (bp) | 947 | 665 |
| rRNA operons | 1*(16s-23s-5s-5s)  7*(16s-23s-5s) |  |
| tRNA | 91 |  |

**Table S1. General features of *K. pneumoniae* R50 genome**

**Table S2. Species distribution of IncR plasmids**

| **species** | **count** |
| --- | --- |
| Citrobacter farmeri | 1 |
| Citrobacter freundii | 9 |
| Citrobacter rodentium | 1 |
| Enterobacter asburiae | 2 |
| Enterobacter cloacae | 18 |
| Enterobacter hormaechei | 3 |
| Enterobacter roggenkampii | 1 |
| Escherichia coli | 29 |
| Escherichia fergusonii | 1 |
| Klebsiella aerogenes | 2 |
| Klebsiella oxytoca | 1 |
| Klebsiella pneumoniae | 182 |
| Klebsiella quasipneumoniae | 3 |
| Klebsiella variicola | 3 |
| Pantoea agglomerans | 1 |
| Proteus mirabilis | 1 |
| Providencia stuartii | 1 |
| Pseudomonas aeruginosa | 1 |
| Raoultella planticola | 1 |
| Salmonella enterica | 1 |
| **total** | **262** |

**Table S3. Bacterial information for evolutionary analysis**

| **Index** | **Accession number** | **Species** |
| --- | --- | --- |
| 1 | gi|1231143664|gb|CP022698.1| | *Citrobacter farmeri* |
| 2 | gi|1243044510|gb|MF497781.1| | *Citrobacter freundii* |
| 3 | gi|1493603797|gb|MH477637.1| | *Citrobacter freundii* |
| 4 | gi|1535846779|gb|MH919378.1| | *Citrobacter freundii* |
| 5 | gi|1243044469|gb|MF497780.1| | *Citrobacter freundii* |
| 6 | gi|1301643982|gb|MG557994.1| | *Citrobacter freundii* |
| 7 | gi|1301644023|gb|MG557995.1| | *Citrobacter freundii* |
| 8 | gi|1301644064|gb|MG557996.1| | *Citrobacter freundii* |
| 9 | gi|1301644105|gb|MG557997.1| | *Citrobacter freundii* |
| 10 | gi|1384232072|dbj|AP018567.1| | *Citrobacter freundii* |
| 11 | gi|1418454405|gb|CP030345.1| | *Enterobacter cloacae* |
| 12 | gi|787518906|gb|KM877517.1| | *Enterobacter cloacae* |
| 13 | gi|1004328143|gb|KU302802.1| | *Enterobacter cloacae* |
| 14 | gi|1004327978|gb|KU302801.1| | *Enterobacter cloacae* |
| 15 | gi|828895865|gb|CP011571.1| | *Enterobacter cloacae* |
| 16 | gi|828911534|gb|CP011580.1| | *Enterobacter cloacae* |
| 17 | gi|828977575|gb|CP011649.1| | *Enterobacter cloacae* |
| 18 | gi|1384662975|gb|MG764554.1| | *Enterobacter cloacae* |
| 19 | gi|828916727|gb|CP011583.1| | *Enterobacter cloacae* |
| 20 | gi|1395327219|gb|CP021168.1| | *Enterobacter cloacae* |
| 21 | gi|1395312997|gb|CP021163.1| | *Enterobacter cloacae* |
| 22 | gi|682112725|gb|CP008898.1| | *Enterobacter cloacae* |
| 23 | gi|1167690283|gb|KY296104.1| | *Enterobacter cloacae* |
| 24 | gi|1467491785|dbj|AP018830.1| | *Enterobacter hormaechei* |
| 25 | gi|1584097536|gb|CP036311.1| | *Enterobacter hormaechei* |
| 26 | gi|1376514255|gb|MG252895.1| | *Escherichia coli* |
| 27 | gi|1243045118|gb|MF589339.1| | *Escherichia coli* |
| 28 | gi|1360512703|emb|LT985249.1| | *Escherichia coli* |
| 29 | gi|1114159551|gb|CP010149.1| | *Escherichia coli* |
| 30 | gi|1190360403|gb|KY798506.1| | *Escherichia coli* |
| 31 | gi|938507360|gb|KT845955.1| | *Escherichia coli* |
| 32 | gi|1395893969|gb|CP021195.1| | *Escherichia coli* |
| 33 | gi|1114210311|gb|CP010174.1| | *Escherichia coli* |
| 34 | gi|1208619820|gb|CP021881.1| | *Escherichia coli* |
| 35 | gi|1384651626|gb|MG825381.1| | *Escherichia coli* |
| 36 | gi|1433039703|gb|CP025944.3| | *Escherichia coli* |
| 37 | gi|1151186796|gb|CP018989.1| | *Escherichia coli* |
| 38 | gi|1493765939|gb|CP032988.1| | *Escherichia coli* |
| 39 | gi|1301644187|gb|MG557999.1| | *Escherichia coli* |
| 40 | gi|1441520707|gb|MG836696.1| | *Escherichia coli* |
| 41 | gi|1279194805|gb|CP024857.1| | *Escherichia coli* |
| 42 | gi|1151231000|gb|CP019017.1| | *Escherichia coli* |
| 43 | gi|651033488|emb|HG963476.1| | *Escherichia coli* |
| 44 | gi|1108565077|gb|CP018105.1| | *Escherichia coli* |
| 45 | gi|1108569934|gb|CP018111.1| | *Escherichia coli* |
| 46 | gi|1108574783|gb|CP018117.1| | *Escherichia coli* |
| 47 | gi|1108579629|gb|CP018123.1| | *Escherichia coli* |
| 48 | gi|1360518725|emb|LT985322.1| | *Escherichia coli* |
| 49 | gi|218350150|emb|CU928144.1| | *Escherichia fergusonii* |
| 50 | gi|1376190040|gb|MG288683.1| | *Klebsiella aerogenes* |
| 51 | pR50-74 | *Klebsiella pneumoniae* |
| 52 | gi|1062713554|gb|CP012566.1| | *Klebsiella pneumoniae* |
| 53 | gi|1062719365|gb|CP012571.1| | *Klebsiella pneumoniae* |
| 54 | gi|1391531868|gb|MH255827.1| | *Klebsiella pneumoniae* |
| 55 | gi|365803828|gb|CP003224.1| | *Klebsiella pneumoniae* |
| 56 | gi|472302154|gb|KC405622.1| | *Klebsiella pneumoniae* |
| 57 | gi|1206209274|gb|CP021761.1| | *Klebsiella pneumoniae* |
| 58 | gi|1057968291|gb|CP016919.1| | *Klebsiella pneumoniae* |
| 59 | gi|1120824496|gb|CP018724.1| | *Klebsiella pneumoniae* |
| 60 | gi|1120800916|gb|CP018699.1| | *Klebsiella pneumoniae* |
| 61 | gi|1476650218|gb|CP032227.1| | *Klebsiella pneumoniae* |
| 62 | gi|1114568913|gb|CP018354.1| | *Klebsiella pneumoniae* |
| 63 | gi|1202218802|gb|CP021547.1| | *Klebsiella pneumoniae* |
| 64 | gi|1208699032|gb|CP021943.1| | *Klebsiella pneumoniae* |
| 65 | gi|1432252197|dbj|AP018755.1| | *Klebsiella pneumoniae* |
| 66 | gi|1519475198|gb|CP033901.1| | *Klebsiella pneumoniae* |
| 67 | gi|1384232088|dbj|AP018583.1| | *Klebsiella pneumoniae* |
| 68 | gi|1187402631|gb|CP020902.1| | *Klebsiella pneumoniae* |
| 69 | gi|1409373696|gb|CP022612.1| | *Klebsiella pneumoniae* |
| 70 | gi|530347473|gb|CP006657.1| | *Klebsiella pneumoniae* |
| 71 | gi|1114601939|gb|CP018365.1| | *Klebsiella pneumoniae* |
| 72 | gi|1574042019|gb|MK396843.1| | *Klebsiella pneumoniae* |
| 73 | gi|1339013836|gb|CP026397.1| | *Klebsiella pneumoniae* |
| 74 | gi|902611358|gb|CP011977.1| | *Klebsiella pneumoniae* |
| 75 | gi|1530713295|gb|CP034040.1| | *Klebsiella pneumoniae* |
| 76 | gi|1269242179|gb|CP023554.1| | *Klebsiella pneumoniae* |
| 77 | gi|1266999745|gb|CP023942.1| | *Klebsiella pneumoniae* |
| 78 | gi|1398622440|gb|CP029723.1| | *Klebsiella pneumoniae* |
| 79 | gi|1240181407|gb|MF437312.1| | *Klebsiella pneumoniae* |
| 80 | gi|1399734359|gb|CP028541.2| | *Klebsiella pneumoniae* |
| 81 | gi|943457735|gb|KT818627.1| | *Klebsiella pneumoniae* |
| 82 | gi|1332754599|gb|CP025952.1| | *Klebsiella pneumoniae* |
| 83 | gi|1233707932|gb|MF168403.1| | *Klebsiella pneumoniae* |
| 84 | gi|1233708340|gb|MF168405.1| | *Klebsiella pneumoniae* |
| 85 | gi|1384664493|gb|MF156695.1| | *Klebsiella pneumoniae* |
| 86 | gi|1444558613|gb|CP026131.1| | *Klebsiella pneumoniae* |
| 87 | gi|1564248914|gb|CP026141.1| | *Klebsiella pneumoniae* |
| 88 | gi|1384661323|gb|MG764550.1| | *Klebsiella pneumoniae* |
| 89 | gi|1220493807|gb|MF133495.1| | *Klebsiella pneumoniae* |
| 90 | gi|1486391278|gb|MH477636.1| | *Klebsiella pneumoniae* |
| 91 | gi|1114629524|gb|CP018455.1| | *Klebsiella pneumoniae* |
| 92 | gi|902625122|gb|CP011990.1| | *Klebsiella pneumoniae* |
| 93 | gi|1317758576|gb|CP025463.1| | *Klebsiella pneumoniae* |
| 94 | gi|1534487993|gb|CP034324.1| | *Klebsiella pneumoniae* |
| 95 | gi|1344162864|gb|CP026584.1| | *Klebsiella pneumoniae* |
| 96 | gi|1552773062|gb|MK167987.1| | *Klebsiella pneumoniae* |
| 97 | gi|1509152242|gb|CP033404.1| | *Klebsiella pneumoniae* |
| 98 | gi|1464473000|gb|CP031720.1| | *Klebsiella pneumoniae* |
| 99 | gi|1584047593|gb|CP036301.1| | *Klebsiella pneumoniae* |
| 100 | gi|1552773384|gb|MK167989.1| | *Klebsiella pneumoniae* |
| 101 | gi|1233708139|gb|MF168404.1| | *Klebsiella pneumoniae* |
| 102 | gi|961666360|gb|KT185451.1| | *Klebsiella pneumoniae* |
| 103 | gi|299474760|gb|FJ628167.2| | *Klebsiella pneumoniae* |
| 104 | gi|1378055449|gb|CP028582.1| | *Klebsiella pneumoniae* |
| 105 | gi|1390424610|gb|CP029381.1| | *Klebsiella pneumoniae* |
| 106 | gi|1233707742|gb|MF168402.1| | *Klebsiella pneumoniae* |
| 107 | gi|1388214979|gb|CP029225.1| | *Klebsiella pneumoniae* |
| 108 | gi|1212890037|gb|KY174332.1| | *Klebsiella pneumoniae* |
| 109 | gi|1382825734|gb|CP028955.1| | *Klebsiella pneumoniae* |
| 110 | gi|746616805|gb|KJ187752.1| | *Klebsiella pneumoniae* |
| 111 | gi|1511001896|gb|MK104259.1| | *Klebsiella pneumoniae* |
| 112 | gi|1360859627|gb|CP024430.1| | *Klebsiella pneumoniae* |
| 113 | gi|1378921531|gb|CP028805.1| | *Klebsiella pneumoniae* |
| 114 | gi|1317764187|gb|CP025468.1| | *Klebsiella pneumoniae* |
| 115 | gi|1317752866|gb|CP025458.1| | *Klebsiella pneumoniae* |
| 116 | gi|751372783|gb|KP008371.1| | *Klebsiella pneumoniae* |
| 117 | gi|1476622549|gb|CP032189.1| | *Klebsiella pneumoniae* |
| 118 | gi|1391531392|gb|MH263653.1| | *Klebsiella pneumoniae* |
| 119 | gi|1584087299|gb|CP036362.1| | *Klebsiella pneumoniae* |
| 120 | gi|1353787790|gb|CP027067.1| | *Klebsiella pneumoniae* |
| 121 | gi|1378926910|gb|CP028796.1| | *Klebsiella pneumoniae* |
| 122 | gi|1190361309|gb|KY751926.1| | *Klebsiella pneumoniae* |
| 123 | gi|1468960166|gb|CP031883.1| | *Klebsiella pneumoniae* |
| 124 | gi|1559984379|gb|MH917279.1| | *Klebsiella pneumoniae* |
| 125 | gi|1517371350|gb|CP033628.1| | *Klebsiella pneumoniae* |
| 126 | gi|1526233929|gb|CP034125.1| | *Klebsiella pneumoniae* |
| 127 | gi|406352863|gb|JX283456.1| | *Klebsiella pneumoniae* |
| 128 | gi|1035427824|emb|LT009689.1| | *Klebsiella pneumoniae* |
| 129 | gi|1095429891|gb|CP016403.1| | *Klebsiella pneumoniae* |
| 130 | gi|1564237462|gb|CP026133.1| | *Klebsiella pneumoniae* |
| 131 | gi|1352749782|gb|CP025213.1| | *Klebsiella pneumoniae* |
| 132 | gi|1398288122|gb|CP023725.1| | *Klebsiella pneumoniae* |
| 133 | gi|110264421|gb|DQ449578.1| | *Klebsiella pneumoniae* |
| 134 | gi|1028116776|emb|HG969996.1| | *Klebsiella pneumoniae* |
| 135 | gi|672605144|gb|CP009116.1| | *Klebsiella pneumoniae* |
| 136 | gi|1114620738|gb|CP018448.1| | *Klebsiella pneumoniae* |
| 137 | gi|1114626366|gb|CP018451.1| | *Klebsiella pneumoniae* |
| 138 | gi|1476639402|gb|CP032176.1| | *Klebsiella pneumoniae* |
| 139 | gi|1274894564|gb|CP024573.1| | *Klebsiella pneumoniae* |
| 140 | gi|1093006983|gb|CP011839.1| | *Klebsiella pneumoniae* |
| 141 | gi|640856169|gb|CP007735.1| | *Klebsiella pneumoniae* |
| 142 | gi|1100613181|gb|CP017935.1| | *Klebsiella pneumoniae* |
| 143 | gi|1206193013|gb|CP021741.1| | *Klebsiella pneumoniae* |
| 144 | gi|150958513|gb|CP000650.1| | *Klebsiella pneumoniae* |
| 145 | gi|1202259309|gb|CP021698.1| | *Klebsiella pneumoniae* |
| 146 | gi|1160548085|gb|KY689238.1| | *Klebsiella pneumoniae* |
| 147 | gi|660582175|gb|CP008798.1| | *Klebsiella pneumoniae* |
| 148 | gi|743008998|gb|CP010362.1| | *Klebsiella pneumoniae* |
| 149 | gi|971339514|gb|CP006662.2| | *Klebsiella pneumoniae* |
| 150 | gi|1125932667|gb|CP018819.1| | *Klebsiella pneumoniae* |
| 151 | gi|1564260351|gb|CP026152.1| | *Klebsiella pneumoniae* |
| 152 | gi|1552089775|gb|CP025578.1| | *Klebsiella pneumoniae* |
| 153 | gi|1266987875|gb|CP023926.1| | *Klebsiella pneumoniae* |
| 154 | gi|1266993934|gb|CP023934.1| | *Klebsiella pneumoniae* |
| 155 | gi|1317769507|gb|CP025517.1| | *Klebsiella pneumoniae* |
| 156 | gi|1383742965|gb|MG764549.1| | *Klebsiella pneumoniae* |
| 157 | gi|1036427838|gb|CP015991.1| | *Klebsiella pneumoniae* |
| 158 | gi|1196625196|gb|CP020856.1| | *Klebsiella pneumoniae* |
| 159 | gi|760459974|gb|KJ958927.1| | *Klebsiella pneumoniae* |
| 160 | gi|1163072007|gb|CP020110.1| | *Klebsiella pneumoniae* |
| 161 | gi|1123428128|gb|CP018737.1| | *Klebsiella pneumoniae* |
| 162 | gi|754341646|gb|CP010575.1| | *Klebsiella pneumoniae* |
| 163 | gi|742999823|gb|CP010396.1| | *Klebsiella pneumoniae* |
| 164 | gi|1450480291|gb|CP031581.1| | *Klebsiella pneumoniae* |
| 165 | gi|1380945488|gb|CP028931.1| | *Klebsiella pneumoniae* |
| 166 | gi|667713574|gb|CP006801.1| | *Klebsiella pneumoniae* |
| 167 | gi|1345404136|gb|CP026753.1| | *Klebsiella pneumoniae* |
| 168 | gi|1384494271|gb|CP029135.1| | *Klebsiella pneumoniae* |
| 169 | gi|1202265413|gb|CP021712.1| | *Klebsiella pneumoniae* |
| 170 | gi|1208693517|gb|CP021953.1| | *Klebsiella pneumoniae* |
| 171 | gi|1114563368|gb|CP018350.1| | *Klebsiella pneumoniae* |
| 172 | gi|1051446430|gb|CP016812.1| | *Klebsiella pneumoniae* |
| 173 | gi|1353813931|gb|CP027150.1| | *Klebsiella pneumoniae* |
| 174 | gi|1417734589|emb|LT994836.1| | *Klebsiella pneumoniae* |
| 175 | gi|571430855|gb|KF793937.1| | *Klebsiella pneumoniae* |
| 176 | gi|1336001450|gb|CP026182.1| | *Klebsiella pneumoniae* |
| 177 | gi|1110961487|gb|CP018316.1| | *Klebsiella pneumoniae* |
| 178 | gi|1130049140|gb|CP017989.1| | *Klebsiella pneumoniae* |
| 179 | gi|1120806789|gb|CP018705.1| | *Klebsiella pneumoniae* |
| 180 | gi|1120818617|gb|CP018718.1| | *Klebsiella pneumoniae* |
| 181 | gi|1120812666|gb|CP018711.1| | *Klebsiella pneumoniae* |
| 182 | gi|1120789574|gb|CP018691.1| | *Klebsiella pneumoniae* |
| 183 | gi|1464578621|gb|CP030134.1| | *Klebsiella pneumoniae* |
| 184 | gi|1243044413|gb|MF510424.1| | *Klebsiella pneumoniae* |
| 185 | gi|1417734845|emb|LT994839.1| | *Klebsiella pneumoniae* |
| 186 | gi|1518649432|emb|LT968753.1| | *Klebsiella pneumoniae* |
| 187 | gi|1509398265|gb|CP033395.1| | *Klebsiella pneumoniae* |
| 188 | gi|1417734670|emb|LT994837.1| | *Klebsiella pneumoniae* |
| 189 | gi|1034308689|gb|KU665641.1| | *Klebsiella pneumoniae* |
| 190 | gi|1530771818|gb|CP027047.1| | *Klebsiella pneumoniae* |
| 191 | gi|929916961|gb|KT225462.1| | *Klebsiella pneumoniae* |
| 192 | gi|512492521|gb|JX424614.1| | *Klebsiella pneumoniae* |
| 193 | gi|1384139278|gb|CP028993.1| | *Klebsiella pneumoniae* |
| 194 | gi|1417734121|emb|LT994834.1| | *Klebsiella pneumoniae* |
| 195 | gi|1567626728|gb|CP035538.1| | *Klebsiella pneumoniae* |
| 196 | gi|1207892797|gb|CP021858.1| | *Klebsiella pneumoniae* |
| 197 | gi|1301644146|gb|MG557998.1| | *Klebsiella pneumoniae* |
| 198 | gi|574609170|gb|KF954150.1| | *Klebsiella pneumoniae* |
| 199 | gi|1206198916|gb|CP021755.1| | *Klebsiella pneumoniae* |
| 200 | gi|1511002242|gb|MK079573.1| | *Klebsiella pneumoniae* |
| 201 | gi|1353857435|gb|CP027162.1| | *Klebsiella pneumoniae* |
| 202 | gi|828971497|gb|CP011644.1| | *Klebsiella pneumoniae* |
| 203 | gi|1163063542|gb|CP020073.1| | *Klebsiella pneumoniae* |
| 204 | gi|1150881362|gb|CP014299.1| | *Klebsiella pneumoniae* |
| 205 | gi|1040719028|dbj|LC155908.1| | *Klebsiella pneumoniae* |
| 206 | gi|1030066427|gb|CP014758.1| | *Klebsiella pneumoniae* |
| 207 | gi|1208687900|gb|CP021948.1| | *Klebsiella pneumoniae* |
| 208 | gi|1345511443|gb|CP014124.1| | *Klebsiella pneumoniae* |
| 209 | gi|1163055369|gb|CP020070.1| | *Klebsiella pneumoniae* |
| 210 | gi|1432246590|dbj|AP018752.1| | *Klebsiella pneumoniae* |
| 211 | gi|660560816|gb|CP008701.1| | *Klebsiella variicola* |
| 212 | gi|1378049846|gb|CP028551.1| | *Klebsiella variicola* |
| 213 | gi|1026616321|gb|CP015347.1| | *Proteus mirabilis* |
| 214 | gi|1391530997|gb|MH061383.1| | *Pseudomonas aeruginosa* |
| 215 | gi|1336438856|gb|CP019900.1| | *Raoultella planticola* |
